# Supplementary material
Source: Research Square preprint supplement (doi:10.21203/rs.3.rs-8863001/v1)

**Figure S1–S3.** Monte Carlo distributions for discrimination, MAIC, and calibration metrics across 1,300 trials.


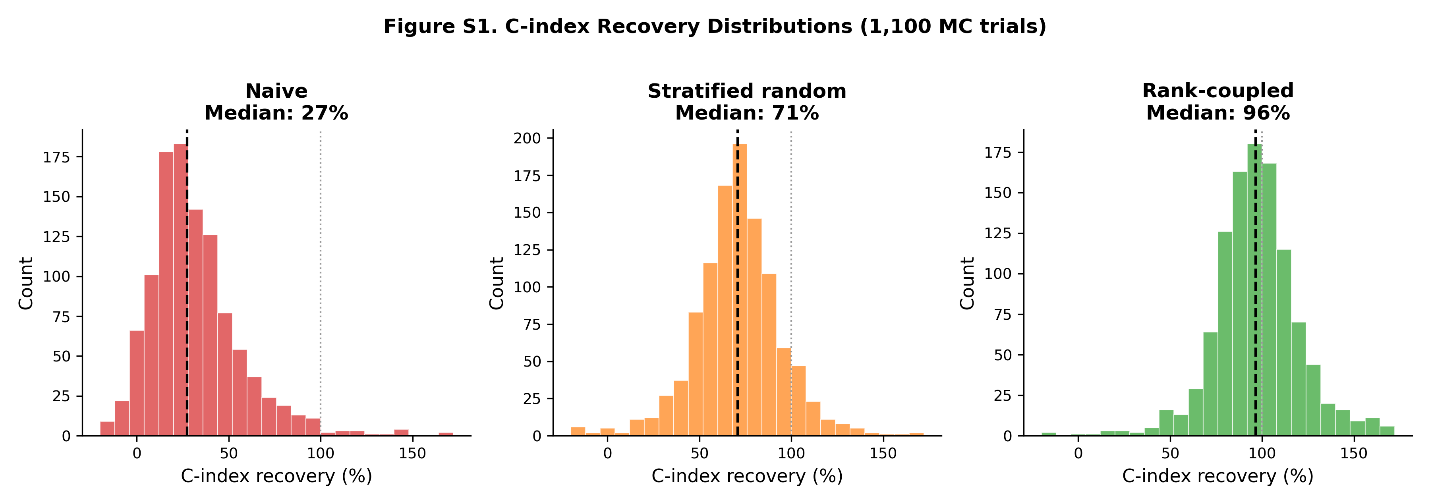

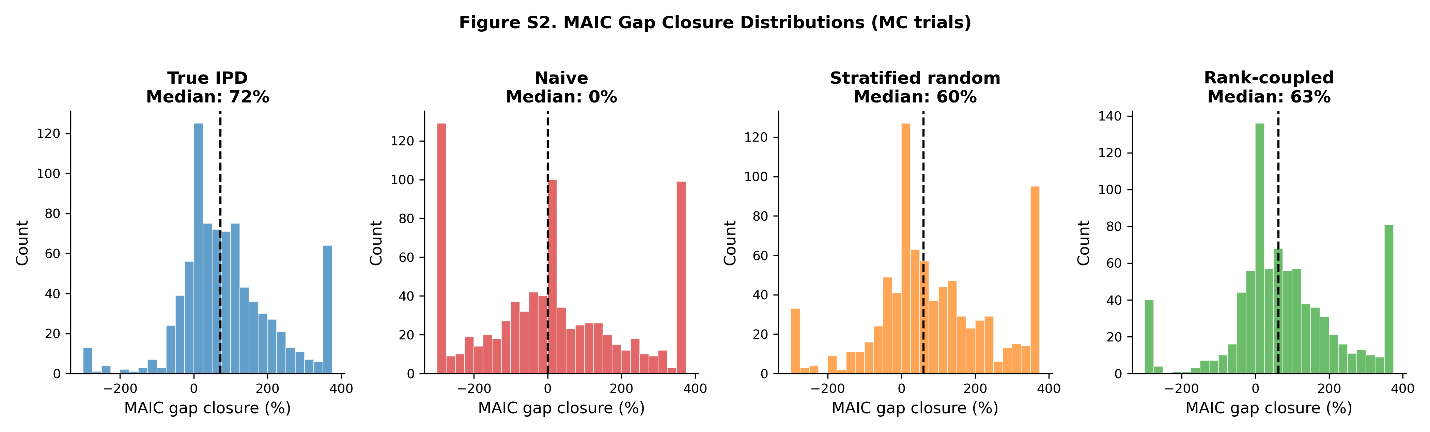

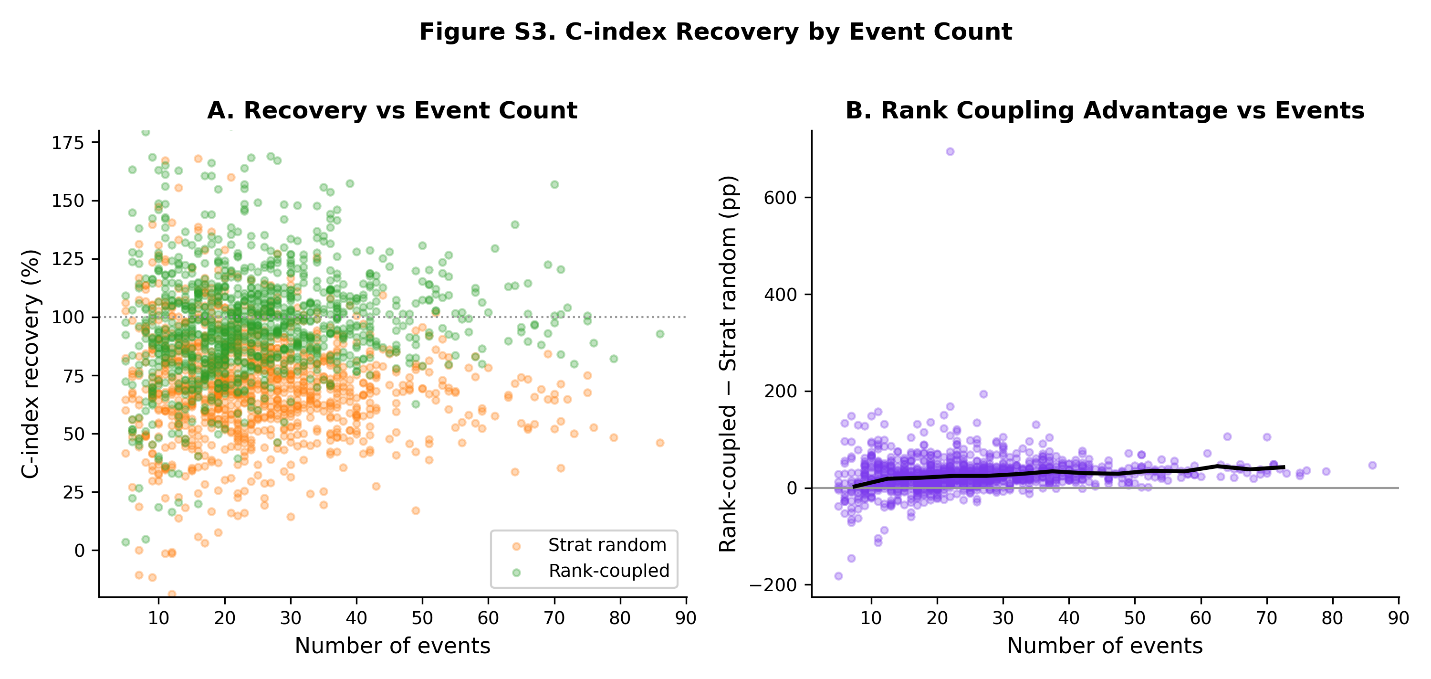


**Figure 4.**

**
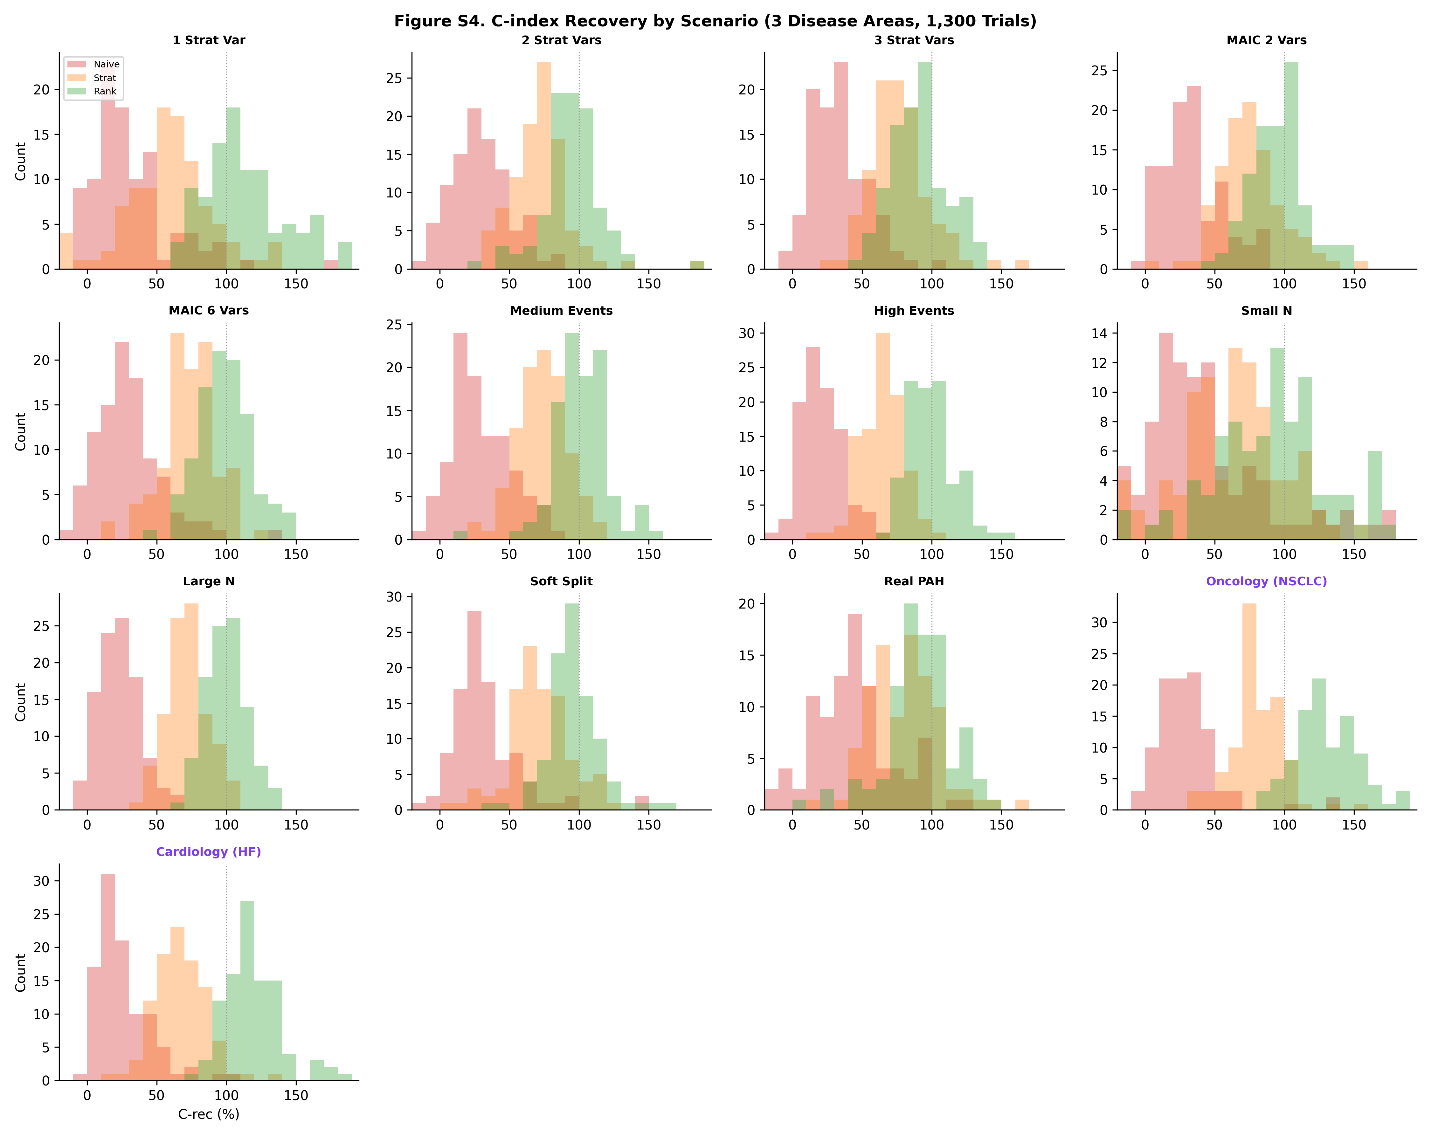
**

**Figure S5.** Scenario comparison boxplots (C-index recovery, MAIC RMSE, three methods).


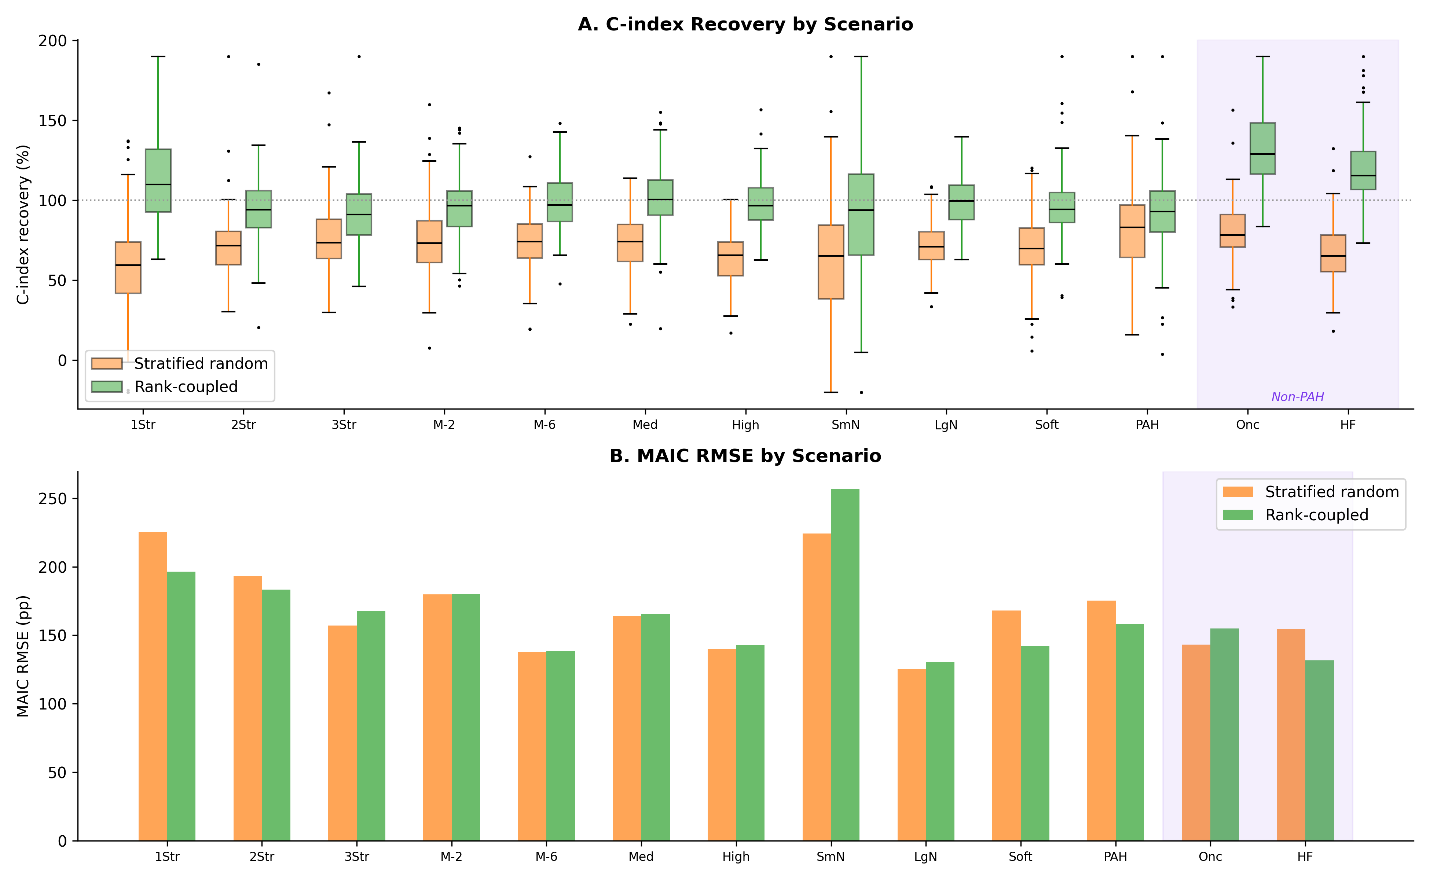


**Figure S6.** Coupling strength sensitivity: C-index recovery distributions at cs = 0.20, 0.30, 0.40.


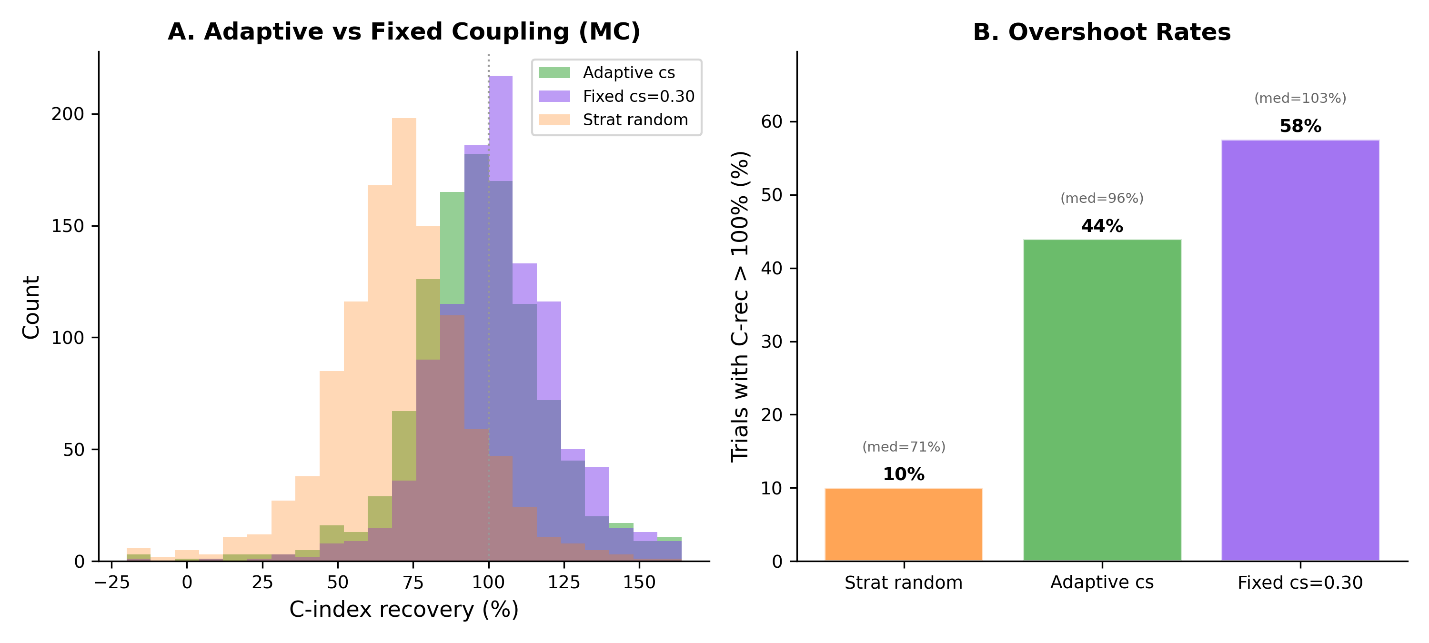


**Figure S7.** Cross-disease generalizability. Panel A: Median C-index recovery by disease area and reconstruction method. Panel B: Rank-coupled vs stratified random win rate by disease area (PAH, oncology, cardiology).


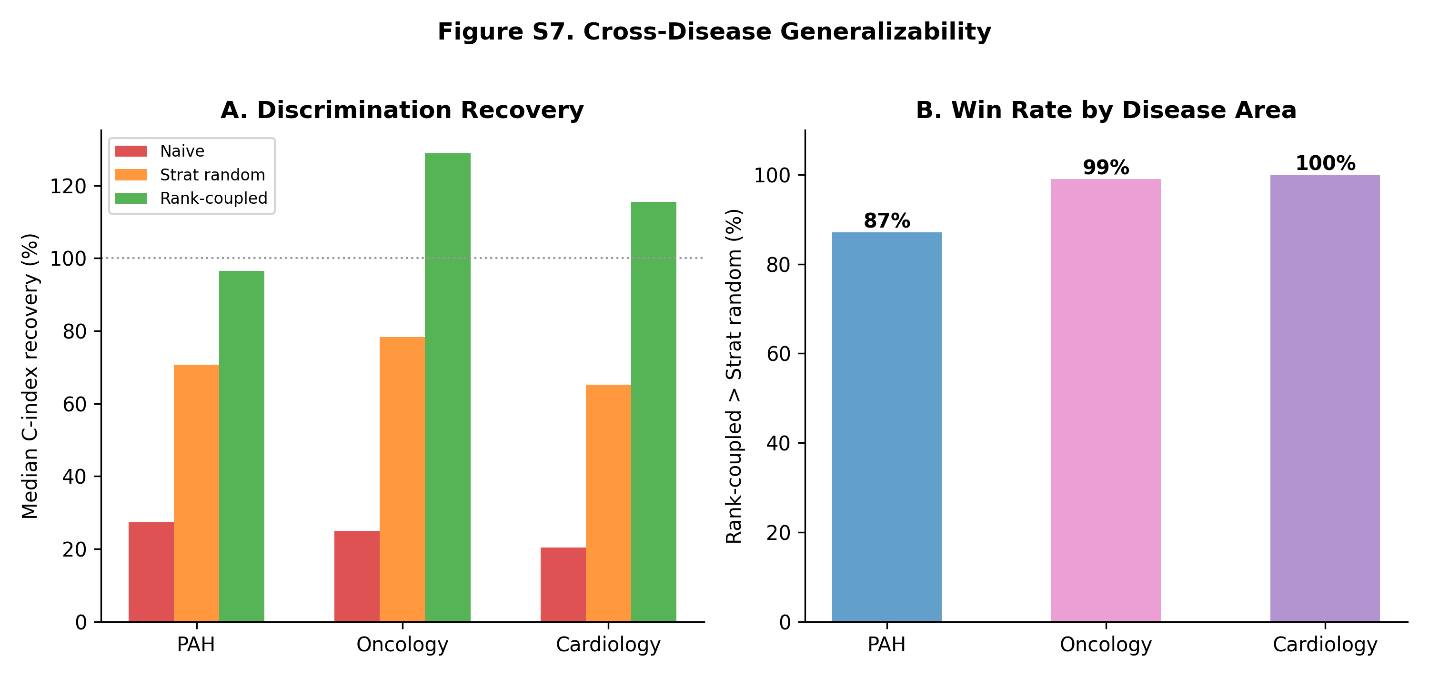

Supplement: Supplementary file 1 [file 196c1324087f9e99d966d26a.docx]
